# Supplementary material
Source: Springer Nature journal article supplement (https://www.springermedizin.de/resource/supplementary/13229_2012_57_MOESM6_ESM.pdf/9676164)
Supplement: MOESM6 [file 9676164]

NT factors  
(ex:BDNF)

NT Rc

mGluR Rc

NMDA Rc

↑Ca<sup>2+</sup>

PTEN

PI3K

Ras

NF1

Akt

ERK

TSC2

TSC1

E3 Ub  
ligase

Pam / Phr1

FBXO45

Rheb

?  
GEF  
function

Pam / Phr1

Other  
synaptic targets ?

Neurodevelopment

4E-BP

mTOR

S6K

eIF4E

S6

Synaptic Plasticity  
Local Protein Synthesis  
Neuronal Activity
